# Supplementary material for: Faecal microbiota transplantation: A life-saving therapy challenged by commercial claims for exclusivity
Source: PubMed Central journal article supplement — eClinicalMedicine. 2020 Jul 2;24:100436. doi: 10.1016/j.eclinm.2020.100436 (PMC7334803; doi:10.1016/j.eclinm.2020.100436), 2020-07-02
Supplement: mmc1.pdf [file mmc1.pdf]

## Author statements

Please insert the relevant text under the subheadings below. A completed form must be signed by all authors. Please note that we will accept hand-signed and electronic (typewritten) signatures. Please complete multiple forms if necessary, and upload the signed copy with your submission.

**Manuscript title:** Faecal microbiota transplantation: a life-saving therapy challenged by commercial claims for exclusivity

**Corresponding author:** Christian Lodberg Hvas

**Article type:** Commentary

I irrevocably authorise and grant my full consent to the corresponding author of the manuscript to: (1) enter into an exclusive publishing agreement with Elsevier on my behalf, in the relevant form set out at [www.elsevier.com/copyright](http://www.elsevier.com/copyright); and (2) unless I am a US government employee, to grant an exclusive license of rights to Elsevier as part of that publishing agreement, effective on acceptance of the article for publication. If the article is a work made for hire, I am authorized to confirm this on behalf of my employer. I agree that the copyright status selected by the corresponding author for the article shall apply and that this agreement is subject to the governing law of England and Wales.

Does your manuscript have a reference number? No  Yes  If yes, enter number here: **eclinm-D-20-00146**

Does your manuscript have a handling editor? No  Yes  If yes, enter name here: **Derek Anane**

### Authors' contributions

Please insert here the contribution each author made to the manuscript—eg, literature search, figures, study design, data collection, data analysis, data interpretation, writing etc. If all authors contributed equally, please state this. The information provided here must match the contributors' statement in the manuscript.

All authors contributed equally to this commentary. Thus, all authors conceptualised the response, wrote and revised the manuscript.

## Role of the funding source

Please disclose any funding sources and their role, if any, in the writing of the manuscript or the decision to submit it for publication. Examples of involvement include: data collection, analysis, or interpretation; trial design; patient recruitment; or any aspect pertinent to the study. Please also comment whether you have been paid to write this article by a pharmaceutical company or other agency. If you are the corresponding author, please indicate if you had full access to all the data in the study and had final responsibility for the decision to submit for publication. The information provided here must match the role of the funding source statement in the manuscript.

This commentary is the independent work of the listed authors. Innovation Fund Denmark funded in part the establishment of the Centre for Faecal Microbiota Transplantation (CEFTA), j. no. 8056-00006B. The funder had no role in the writing of the manuscript or the decision to submit it for publication.

## Conflicts of interest

Please complete the ICMJE conflict of interest form, which is available at <http://www.thelancet.com/for-authors/forms#icmje-coi>. Please ensure that a conflict of interest statement is included at the end of the manuscript, which matches what is declared on the ICMJE conflict of interest form.

## Patient consent (if applicable) - completion of this section is mandatory for Case Reports, Clinical Pictures, and Adverse Drug Reactions.

Please sign below to confirm that all necessary consents required by applicable law from any relevant patient, research participant, and/or other individual whose information is included in the article have been obtained in writing. **The signed consent form(s) should be retained by the corresponding author and NOT sent to EClinicalMedicine.**

I agree with: the plan to submit to *EClinicalMedicine*; the contents of the manuscript; to being listed as an author; and to the conflicts of interest statement as summarised. I have had access to all the data in the study (for original research articles) and accept responsibility for its validity.

|                 |                              |                 |     |            |                                                                                       |       |              |
|-----------------|------------------------------|-----------------|-----|------------|---------------------------------------------------------------------------------------|-------|--------------|
| Title and name: | Dr Christian Lodberg Hvas    | Highest degree: | PhD | Signature: |  | Date: | 04 June 2020 |
| Title and name: | Dr Simon Mark Dahl Jørgensen | Highest degree: | MD  | Signature: |  | Date: | June 4, 2020 |
| Title and name: | Dr Christian Erikstrup       | Highest degree: | PhD | Signature: |  | Date: | June 4, 2020 |
| Title and name: |                              | Highest degree: |     | Signature: | .....                                                                                 | Date: |              |
| Title and name: |                              | Highest degree: |     | Signature: | .....                                                                                 | Date: |              |
| Title and name: |                              | Highest degree: |     | Signature: | .....                                                                                 | Date: |              |
| Title and name: |                              | Highest degree: |     | Signature: | .....                                                                                 | Date: |              |
| Title and name: |                              | Highest degree: |     | Signature: | .....                                                                                 | Date: |              |
| Title and name: |                              | Highest degree: |     | Signature: | .....                                                                                 | Date: |              |
| Title and name: |                              | Highest degree: |     | Signature: | .....                                                                                 | Date: |              |

## Corresponding author declaration

Christian Lodberg Hvas

I 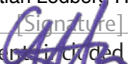 [Signature], the corresponding author of this manuscript, certify that the contributors' and conflicts of interest statements included in this paper are correct and have been approved by all co-authors.
