# Supplementary material for: Faecal microbiota transplantation: A life-saving therapy challenged by commercial claims for exclusivity
Source: PubMed Central journal article supplement — eClinicalMedicine. 2020 Jul 2;24:100436. doi: 10.1016/j.eclinm.2020.100436 (PMC7334803; doi:10.1016/j.eclinm.2020.100436), 2020-07-02
Supplement: mmc2.pdf [file mmc2.pdf]

## Authorisation to transfer author statement and ICMJE forms

Please insert the relevant text under the subheadings below. A completed form must be signed by the corresponding author. Please note that we will accept hand-signed and electronic (typewritten signatures). Please complete the form, scan and email to the handling Editor.

Article originally submitted to: The Lancet

Article now submitted to: **EClinicalMedicine**

Manuscript number at new journal: **eclinm-D-20-00146**

Faecal microbiota transplantation: a life-saving therapy challenged by commercial claims for exclusivity

Manuscript title:

Corresponding author: **Christian Lodberg Hvas**

Article type: **Commentary**

  
| **Christian Lodberg Hvas**

\_\_\_\_\_, the corresponding author of this manuscript confirm that all authors listed are aware that the manuscript is now being considered at **EClinicalMedicine** and have agreed to transfer the original author signature and ICMJE forms from *The Lancet* journal to which it was previously submitted. I (on behalf of all authors) agree that these signatures and statements are still accurate and applicable.
